# Supplementary material for: Phytosynthesis of Silver Nanoparticle (AgNPs) Using Aqueous Leaf Extract of Knoxia sumatrensis (Retz.) DC. and Their Multi-Potent Biological Activity: An Eco-Friendly Approach
Source: MDPI journal article supplement (doi:10.3390/molecules27227854), 2022-11-14
Supplement: s1 [file s1]

# Phytosynthesis of Silver Nanoparticle (AgNPs) Using Aqueous Leaf Extract of *Knoxia Sumatrensis* (Retz.) DC. and Their Multi-Potent Biological Activity: An Eco-Friendly Approach

Settu Loganathan <sup>1,2</sup>, Kuppusamy Selvam <sup>1</sup>, Muthugounder Subaramanian Shivakumar <sup>3</sup>, Sengottayan Senthil-Nathan <sup>4,\*</sup>, Prabhakaran Vasantha-Srinivasan <sup>5</sup>, Dhakshinamoorthy Gnana Prakash <sup>6</sup>, Sengodan Karthi <sup>7</sup>, Fahad Al-Misned <sup>8</sup>, Shahid Mahboob <sup>8</sup>, Ahmed Abdel-Megeed <sup>9</sup>, Aml Ghaith <sup>10</sup> and Patcharin Krutmuang <sup>11,12,\*</sup>

<sup>1</sup> Department of Botany, Periyar University, Salem 636011, Tamil Nadu, India

<sup>2</sup> Department of Anatomy, Saveetha Dental College and Hospital, Saveetha Institute of Medical and Technical Sciences, Chennai 600077, Tamil Nadu, India

<sup>3</sup> Department of Biotechnology, Periyar University, Periyar Palkalai Nagar, Salem 636011, Tamil Nadu, India

<sup>4</sup> Division of Biopesticides and Environmental Toxicology, Sri Paramakalyani Centre for Excellence and Environmental Sciences, Manonmaniam Sundaranar University, Alwarkurichi 627412, Tamil Nadu, India

<sup>5</sup> Department of Bioinformatics, Saveetha School of Engineering, Saveetha Institute of Medical and Technical Sciences (SIMATS), Chennai 602105, Tamil Nadu, India

<sup>6</sup> Department of Chemical Engineering, Sri Sivasubramaniya Nadar College of Engineering, Kalavakkam, Chennai 603110, Tamil Nadu, India

<sup>7</sup> Department of Entomology, University of Kentucky, Kentucky, KY 40503, USA

<sup>8</sup> Department of Zoology, College of Science, King Saud University, Riyadh 11451, Saudi Arabia

<sup>9</sup> Department of Plant Protection, Faculty of Agriculture Saba Basha Alexandria University, Alexandria 5452022, Egypt

<sup>10</sup> Department of Zoology, Faculty of Science, Derna University, Derna, Libya

<sup>11</sup> Department of Entomology and Plant Pathology, Faculty of Agriculture, Chiang Mai University, Chiang Mai 50000, Thailand

<sup>12</sup> Innovative Agriculture Research Center, Faculty of Agriculture, Chiang Mai University, Chiang Mai 50000, Thailand

\* Correspondence: senthil@msuniv.ac.in (S.S.-N.); patcharink26@gmail.com (P.K.)

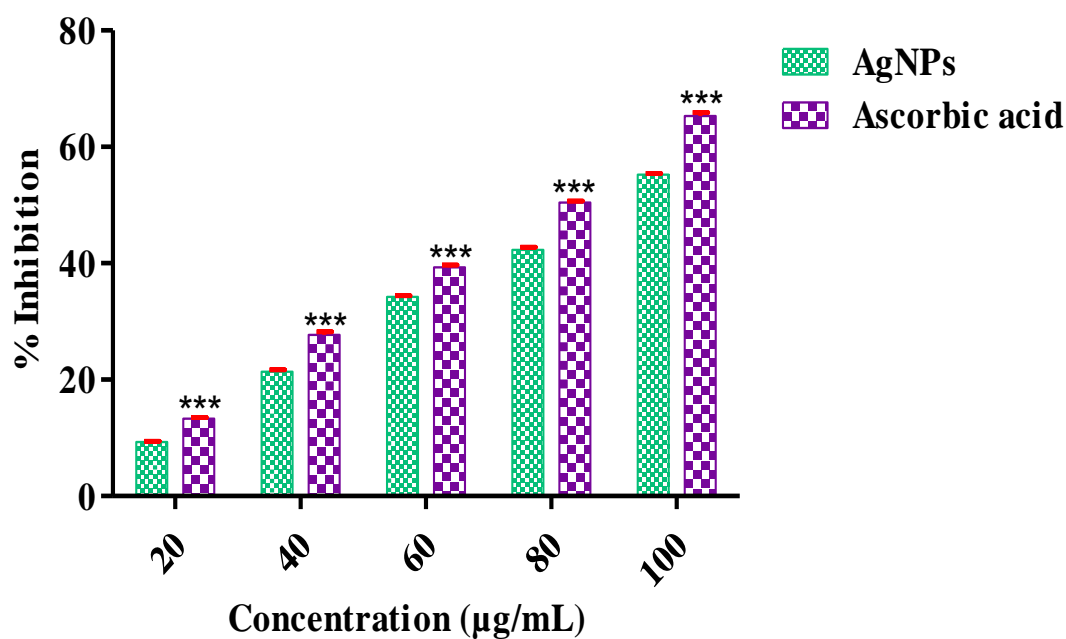

**Figure S1.** Antioxidant activity of AgNPs synthesized using *K. sumatrensis* aqueous leaf extracts (Ks-ALE). (a) DPPH radical scavenging activity. The values are expressed as mean  $\pm$  SD values and analyzed by Two-Way analysis of variance (ANOVA). Asterisk (\*\*\*) indicates significant different among treatments with respect to control ( $p < 0.001$ ).

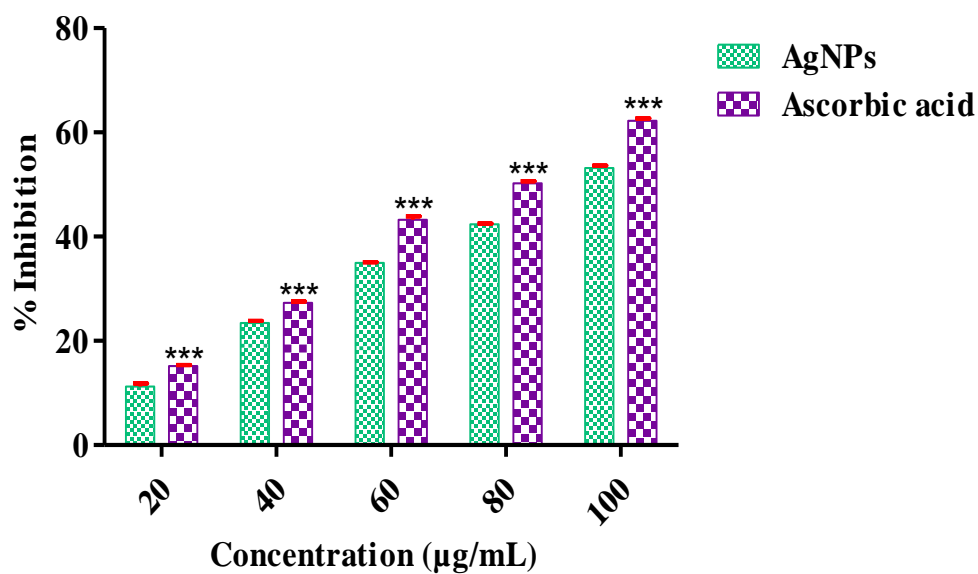

**Figure S2.** Antioxidant activity of AgNPs synthesized using *K. sumatrensis* aqueous leaf extracts (Ks-ALE) (b) ABTS radical scavenging activity. The values are expressed as mean  $\pm$  SD values and analyzed by Two- Way analysis of variance (ANOVA). Asterisk (\*\*\*) indicates significant different among treatments with respect to control ( $p < 0.001$ ).

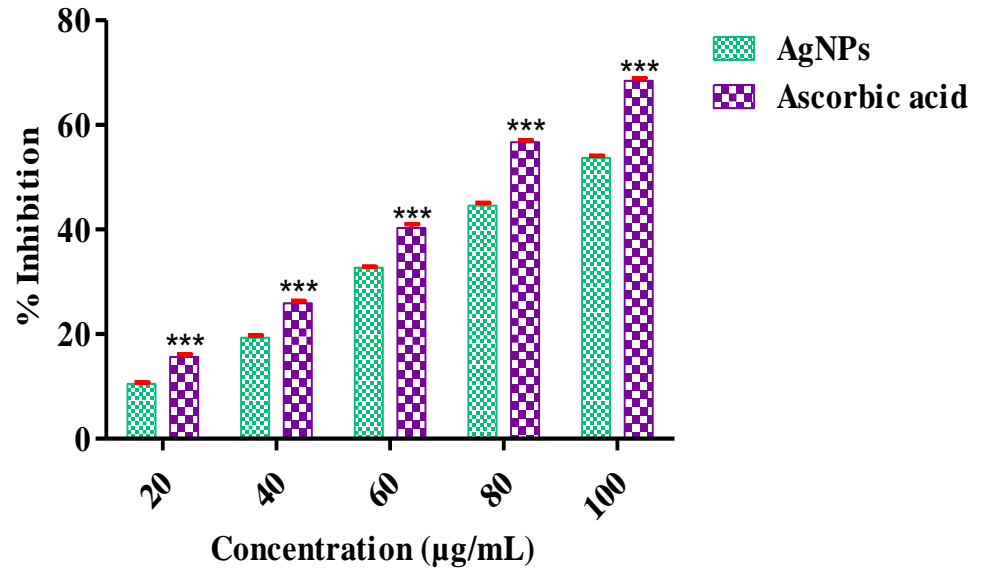

**Figure S3.** Antioxidant activity of AgNPs synthesized using *K. sumatrensis* aqueous leaf extracts (Ks-ALE) (c) Hydroxyl scavenging activity. The values are expressed as mean  $\pm$  SD values and analyzed by Two-Way analysis of variance (ANOVA). Asterisk (\*\*\*) indicates significant different among treatments with respect to control ( $p < 0.001$ ).

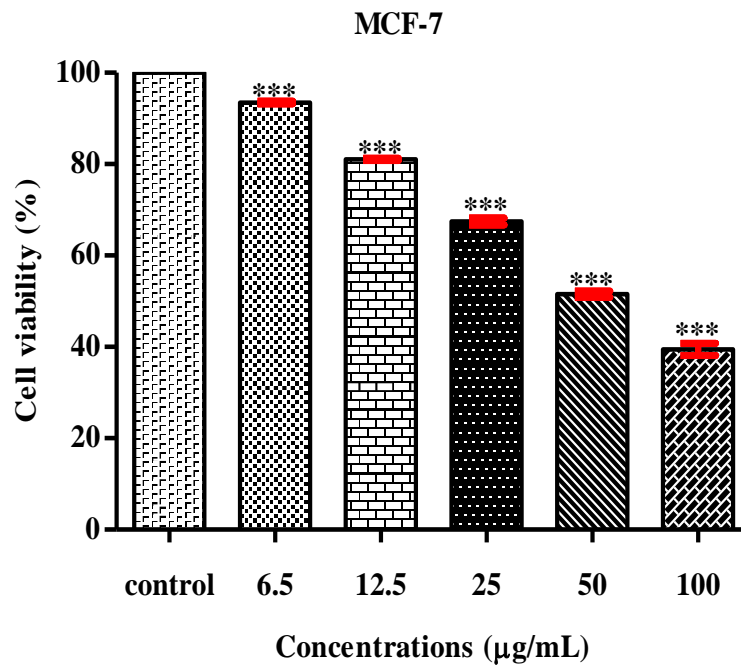

**Figure S4.** MTT assay confirming the Anti-proliferative effects of AgNPs using aqueous leaf extracts of *K. sumatrensis* (Ks-ALE) against MCF-7 cell line. The values are expressed as mean  $\pm$  SD values and analyzed by One - way analysis of variance (ANOVA). Asterisk (\*\*\*) indicates significant different among treatments with respect to control ( $p < 0.001$ ).

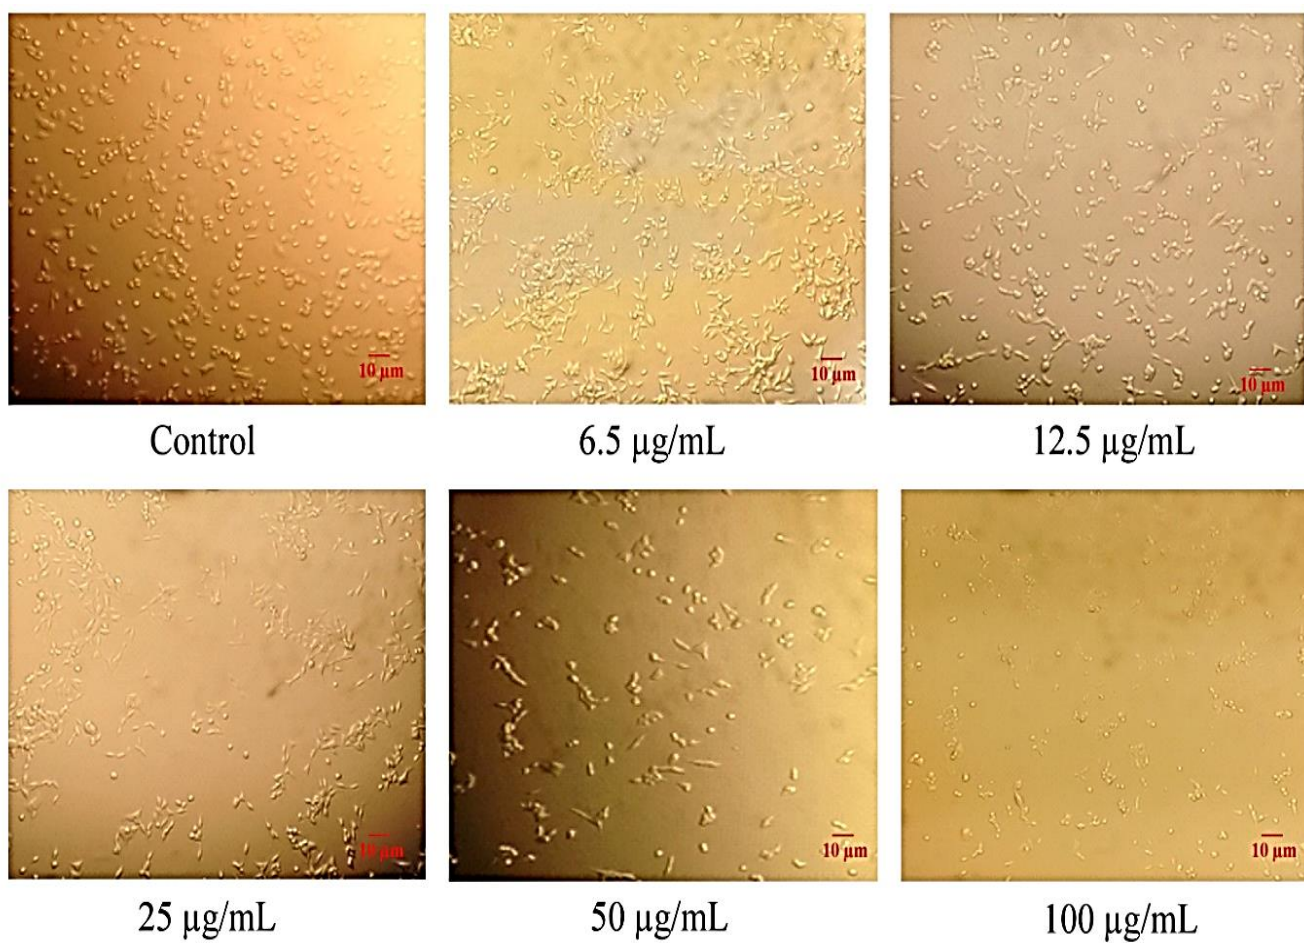

**Figure S5.** Anti-proliferative observed from confocal microscope (340 pixel); Control and various concentrations (6.5, 12.5, 25, 50 and 100  $\mu\text{g/mL}$ ) of *K. sumatrensis* aqueous leaf extract (Ks-ALE) of AgNPs treated on breast cancer cells (MCF-7).

**Table S1.** Larvicidal activity of *K. sumatrensis* aqueous leaf extract (Ks-ALE) and Synthesized AgNPs against *Aedes aegypti*.

| Time (Hour) | Samples       | LC <sub>50</sub> (mg/mL)<br>(LCL-UCL) | LC <sub>90</sub> (mg/mL)<br>(LCL-UCL) | $\chi^2$ | Df |
|-------------|---------------|---------------------------------------|---------------------------------------|----------|----|
| 12          | Plant extract | 37.36 (29.08–66.62)                   | 67.29 (48.42–137.29)                  | 1.79     | 13 |
|             | AgNPs         | 21.81 (18.15–29.49)                   | 51.72 (39.47–86.84)                   | 1.58     | 13 |
| 24          | Plant extract | 26.01 (21.88–35.34)                   | 52.35 (40.70–82.84)                   | 1.32     | 13 |
|             | AgNPs         | 9.56 (6.31–11.82)                     | 27.70 (23.92–34.52)                   | 1.09     | 13 |
| 48          | Plant extract | 16.06 (13.05–19.47)                   | 41.56 (33.42–60.71)                   | 0.76     | 13 |
|             | AgNPs         | 4.46 (3.30–5.42)                      | 17.62 (15.21–21.54)                   | 4.46     | 13 |

LC<sub>50</sub>: Lethal concentration kills 50% of the exposed larvae, LC<sub>90</sub>: Lethal concentration kills 90% of the exposed larvae, LCL: Lower confidence limit, UCL: Upper confidence limit,  $\chi^2$  Chi-square value, df, degrees of freedom.

**Table S2.** Larvicidal activity of *K. sumatrensis* aqueous leaf extract (Ks-ALE) and synthesized AgNPs against *Anopheles stephensi*.

| Time (Hour) | Samples       | LC <sub>50</sub> (mg/mL)<br>(LCL-UCL) | LC <sub>90</sub> (mg/mL)<br>(LCL-UCL) | $\chi^2$ | Df |
|-------------|---------------|---------------------------------------|---------------------------------------|----------|----|
| 12          | Plant extract | 28.13 (23.92–37.23)                   | 50.87 (40.47–75.78)                   | 1.38     | 13 |
|             | AgNPs         | 16.86 (13.76–20.77)                   | 43.76 (34.70–66.30)                   | 1.04     | 13 |
| 24          | Plant extract | 24.24 (20.34–32.92)                   | 30.75 (26.78–37.61)                   | 0.867    | 13 |
|             | AgNPs         | 5.04 (7.73–11.36)                     | 24.30 (20.84–31.14)                   | 2.15     | 13 |
| 48          | Plant extract | 15.54 (12.32–18.99)                   | 42.05 (33.54–62.83)                   | 0.812    | 13 |
|             | AgNPs         | 3.68 (0.99–7.70)                      | 18.94 (16.47–23.00)                   | 3.94     | 13 |

LC<sub>50</sub>: Lethal concentration kills 50% of the exposed larvae, LC<sub>90</sub>: Lethal concentration kills 90% of the exposed larvae, LCL: Lower confidence limit, UCL: Upper confidence limit,  $\chi^2$  Chi-square value, df, degrees of freedom.

**Table S3.** Larvicidal activity of *K. sumatrensis* aqueous leaf extract (Ks-ALE) and synthesized AgNPs against *Culex quinquefasciatus*.

| Time (Hours) | Samples       | LC <sub>50</sub> (mg/mL)<br>(LCL-UCL) | LC <sub>90</sub> (mg/mL)<br>(LCL-UCL) | $\chi^2$ | Df |
|--------------|---------------|---------------------------------------|---------------------------------------|----------|----|
| 12           | Plant extract | 25.06 (21.45–32.37)                   | 48.85 (38.97–72.17)                   | 1.19     | 13 |
|              | AgNPs         | 11.25 (8.47–13.38)                    | 29.28 (25.29–36.44)                   | 1.65     | 13 |
| 24           | Plant extract | 20.68 (17.33–26.92)                   | 49.06 (38.03–78.35)                   | 0.93     | 13 |
|              | AgNPs         | 2.60 (3.24–5.81)                      | 19.30 (16.65–23.78)                   | 3.91     | 13 |
| 48           | Plant extract | 10.99 (6.99–13.72)                    | 34.60 (28.52–47.88)                   | 0.85     | 13 |
|              | AgNPs         | 0.40 (6.64–3.98)                      | 15.83 (13.48–19.51)                   | 2.62     | 13 |

LC<sub>50</sub>: Lethal concentration kills 50% of the exposed larvae, LC<sub>90</sub>: Lethal concentration kills 90% of the exposed larvae, LCL: Lower confidence limit, UCL: Upper confidence limit,  $\chi^2$  Chi-square value, df, degrees of freedom.
